# Supplementary material for: Precision medicine using whole genome sequencing identifies a novel dystrophin (DMD) variant for X‐linked muscular dystrophy in a cat
Source: PubMed Central journal article supplement — J Vet Intern Med. 2024 Jan 5;38(1):135–44. doi: 10.1111/jvim.16971 (PMC10800237; doi:10.1111/jvim.16971), 2024-01-05
Supplement: JVIM-38-135-s001.pdf [file JVIM-38-135-s001.pdf]

## Supplementary Figures

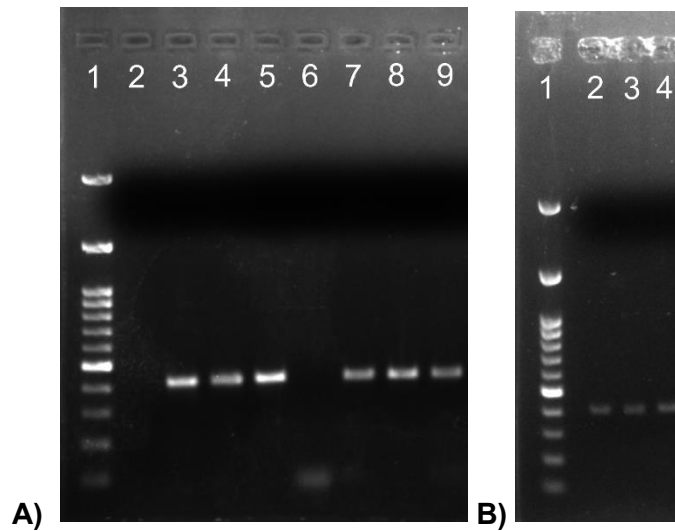

**Supplementary Figure 1. Validation of the *DMD* variant in the affected cat.** A) Optimization of PCR conditions for *DMD* variant validation. The expected 422 bp PCR product was amplified. Lane 1: 100 bp PLUS™ DNA Ladder (Gold Biotechnology, Inc., Olivette, MO); Lanes 2 - 5: 1.5 mM MgCl<sub>2</sub>; Lanes 6 - 9: 2.0 mM MgCl<sub>2</sub>; Lanes 2, 6: No template control, annealing at 55°C; Lanes 3, 7: Fcat\_4406, 55°C; Lanes 4, 8: Fcat\_4406, 58°C; Lanes 5, 9: Fcat\_4406, 61°C. Lane 3 that represented 55°C and 1.5 mM MgCl<sub>2</sub> were used to amplify the case cat for Sanger sequencing. B) *DMD* PCR product for validation by Sanger sequencing. Lane 1: 100 bp PLUS™ DNA Ladder (Gold Biotechnology, Inc., Olivette, MO); 2: control - Fcat\_4406; 3: control - Fcat\_12682; 4: case - Fcat\_23286. DNA from the two control cats and the case cat produce a 422 bp fragment for Sanger sequencing. The brightest fragment in the DNA ladder is 500 bp.
